# Supplementary material for: Polypyrrole-promoted superior cyclability and rate capability of NaxFe[Fe(CN)6] cathodes for sodium-ion batteries
Source: Royal Society of Chemistry journal article supplement (doi:10.1039/c6ta00876c), 2016-01-01
Supplement: c6ta00876c1.pdf [file c6ta00876c1.pdf]

## Supporting information

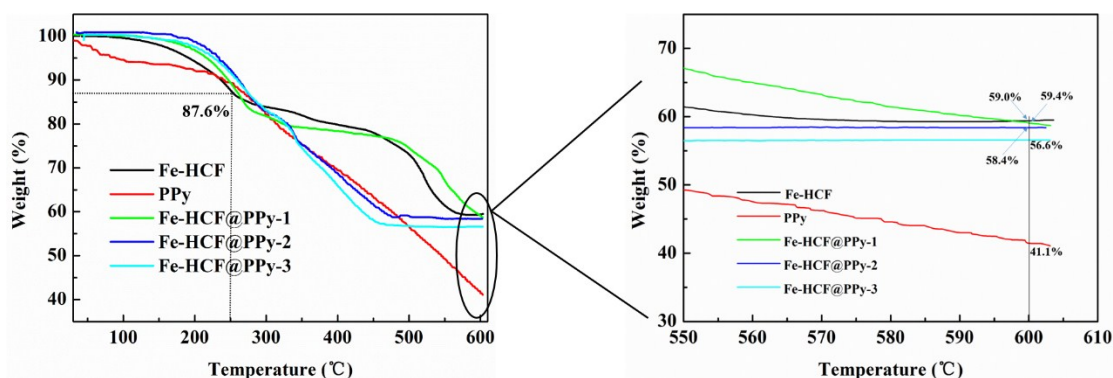

**Fig. S1** TG curves of Fe-HCF, PPy and Fe-HCF@PPy.

In Fig. S1, the weight loss of 12.4% in Fe-HCF below 250 °C is mainly attributed to the absorbed water and zeolitic water.

The PPy contents can be roughly calculated by the formula of  $(1 - x) \cdot L_{Fe-HCF} + x \cdot L_{PPy} = L_{Fe-HCF@PPy}$ , in which  $x$  is the percentage of PPy content in Fe-HCF@PPy, while  $L_{PPy}$ ,  $L_{Fe-HCF}$  and  $L_{Fe-HCF@PPy}$  represent the percentage of weight loss at 600 °C. According to the TG results, the PPy contents in Fe-HCF@PPy-1, Fe-HCF@PPy-2 and Fe-HCF@PPy-3 are calculated as 2.2%, 5.6% and 15.6%, respectively. It is noted that the crossover of TG curves between Fe-HCF and Fe-HCF@PPy-1 can be ascribed to the small amount of PPy in Fe-HCF@PPy-1 and the slightly larger water content in Fe-HCF.

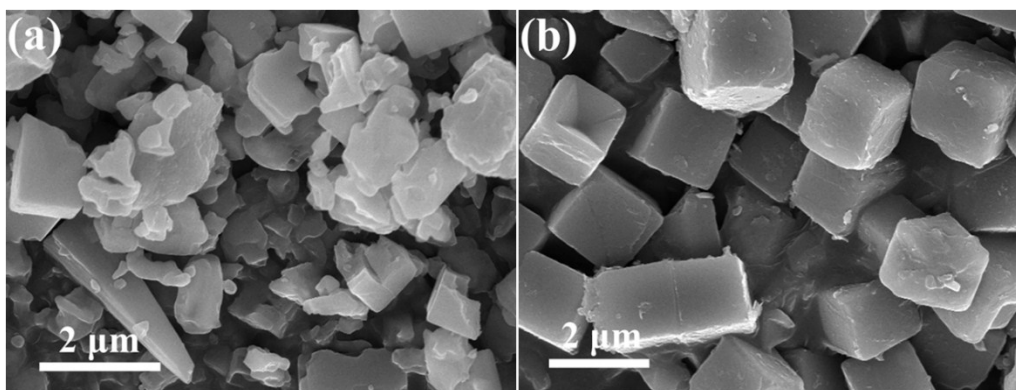

**Fig. S2** SEM images of (a) Fe-HCF and (b) Fe-HCF@PPy-2 after etching in the 1M HCl solution at 140 °C for 4 h.

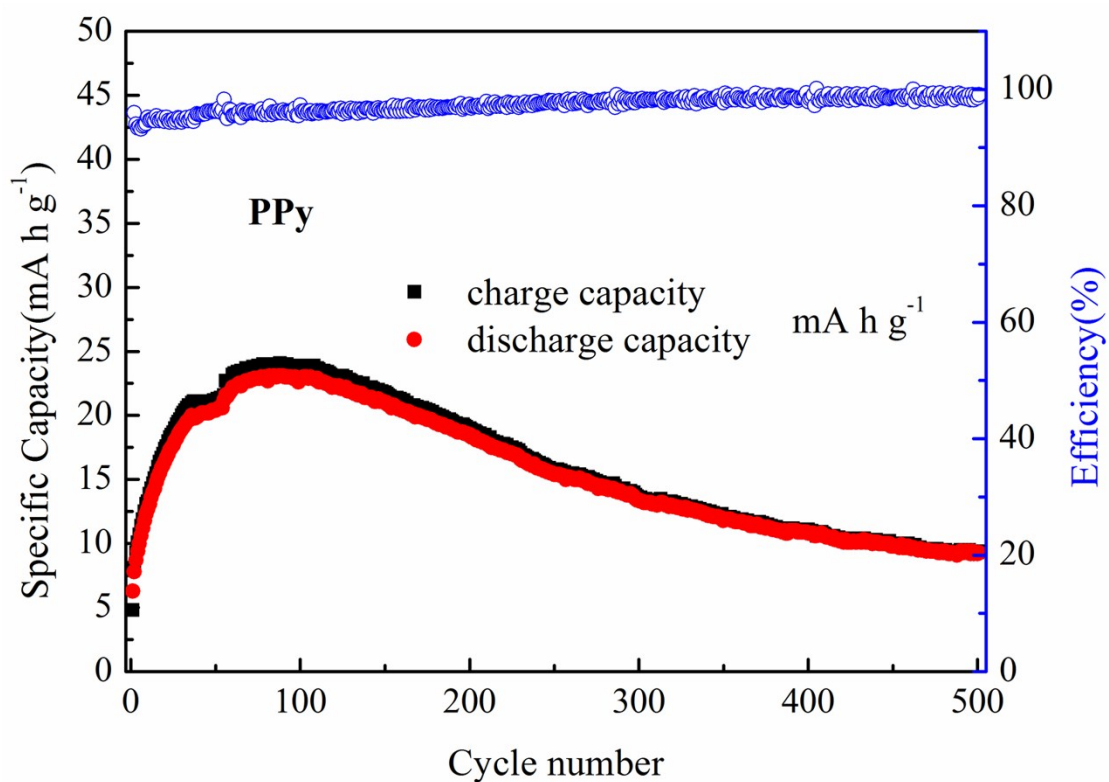

**Fig. S3** Long-term cycling stability of PPy at constant currents of 50 mA g<sup>-1</sup>.

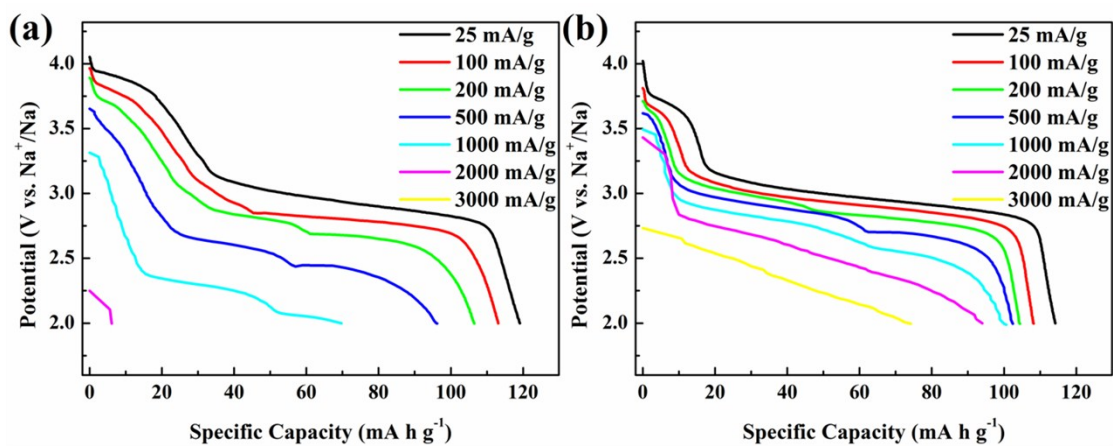

**Fig. S4** Discharge profiles of (a) Fe-HCF and (b) Fe-HCF@PPy-2 electrodes at different rates.

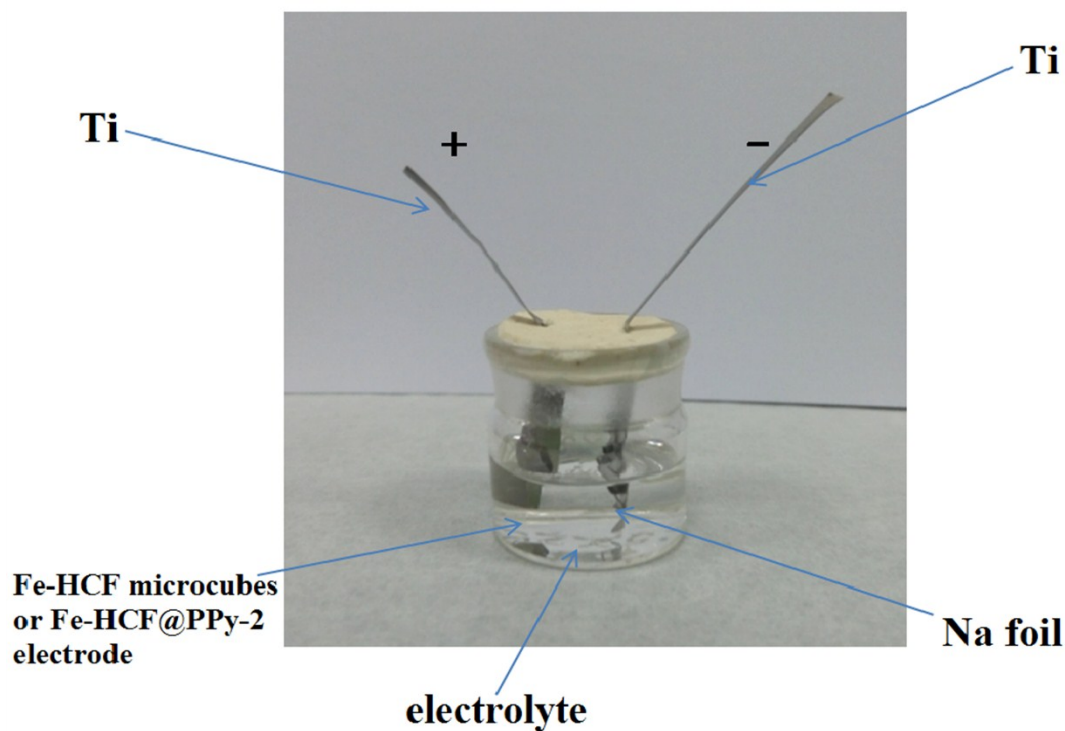

**Fig. S5** Photo image of the homemade half-cell that was assembled and tested in an Ar-filled glovebox.

The homemade half-cell was assembled in an Ar-filled glovebox by using the Fe-HCF or Fe-HCF@PPy-2 electrode as working electrode, metallic-sodium as counter electrode, titanium sheet as current collector, and 1 mol L<sup>-1</sup> NaClO<sub>4</sub> in EC/PC (1:1 by volume) as electrolyte. The working electrode was totally immersed in the electrolyte and the amounts of electrolyte solution were kept at 5 times of active material in mass. After 200 galvanostatic charge-discharge cycles at a current density of 200 mA g<sup>-1</sup> in the glovebox, the content of element Fe in the electrolyte solution was analyzed by inductively coupled plasma emission spectrometer (ICP-OES).
